# Supplementary material
Source: PubMed Central journal article supplement (PMC4372536)

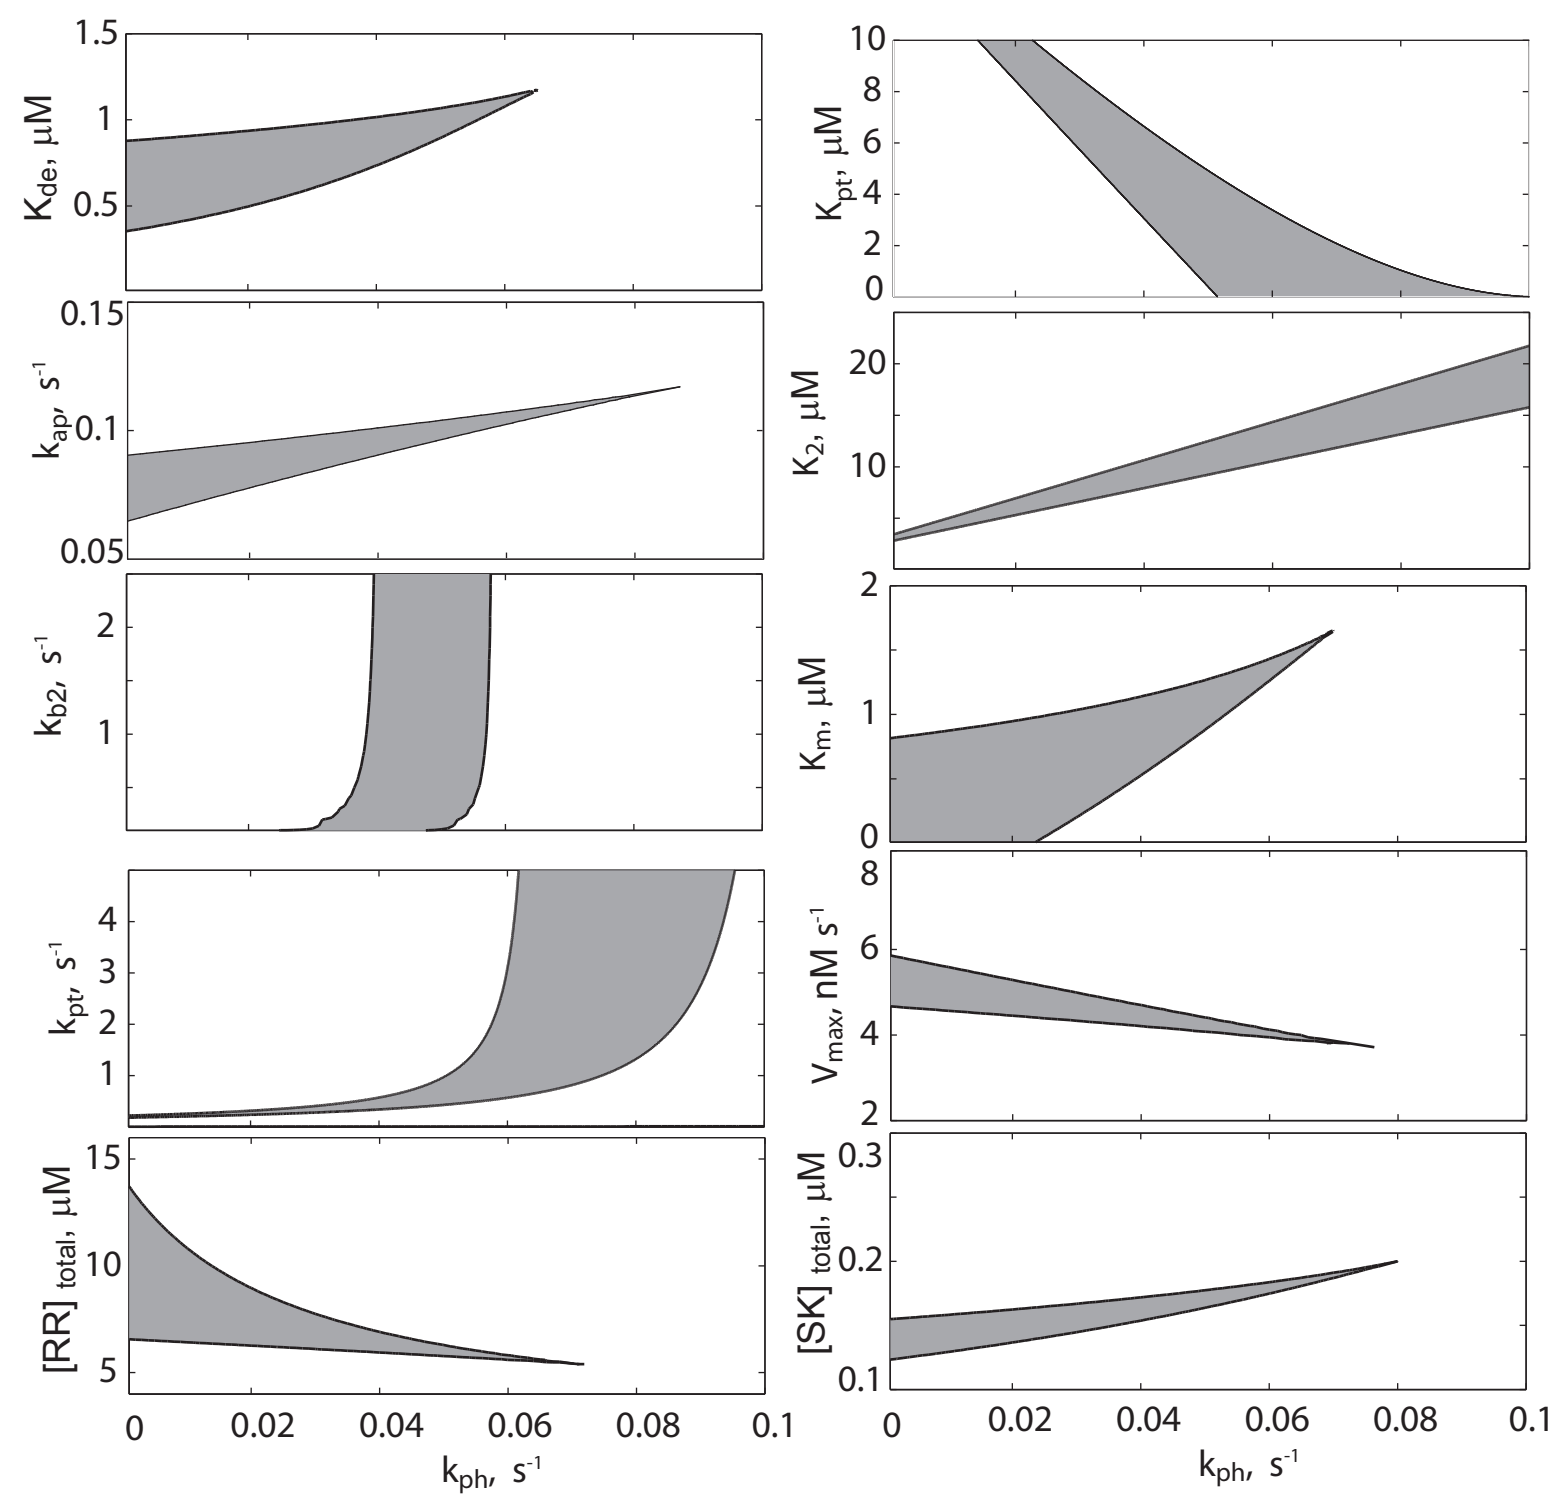

Figure S1

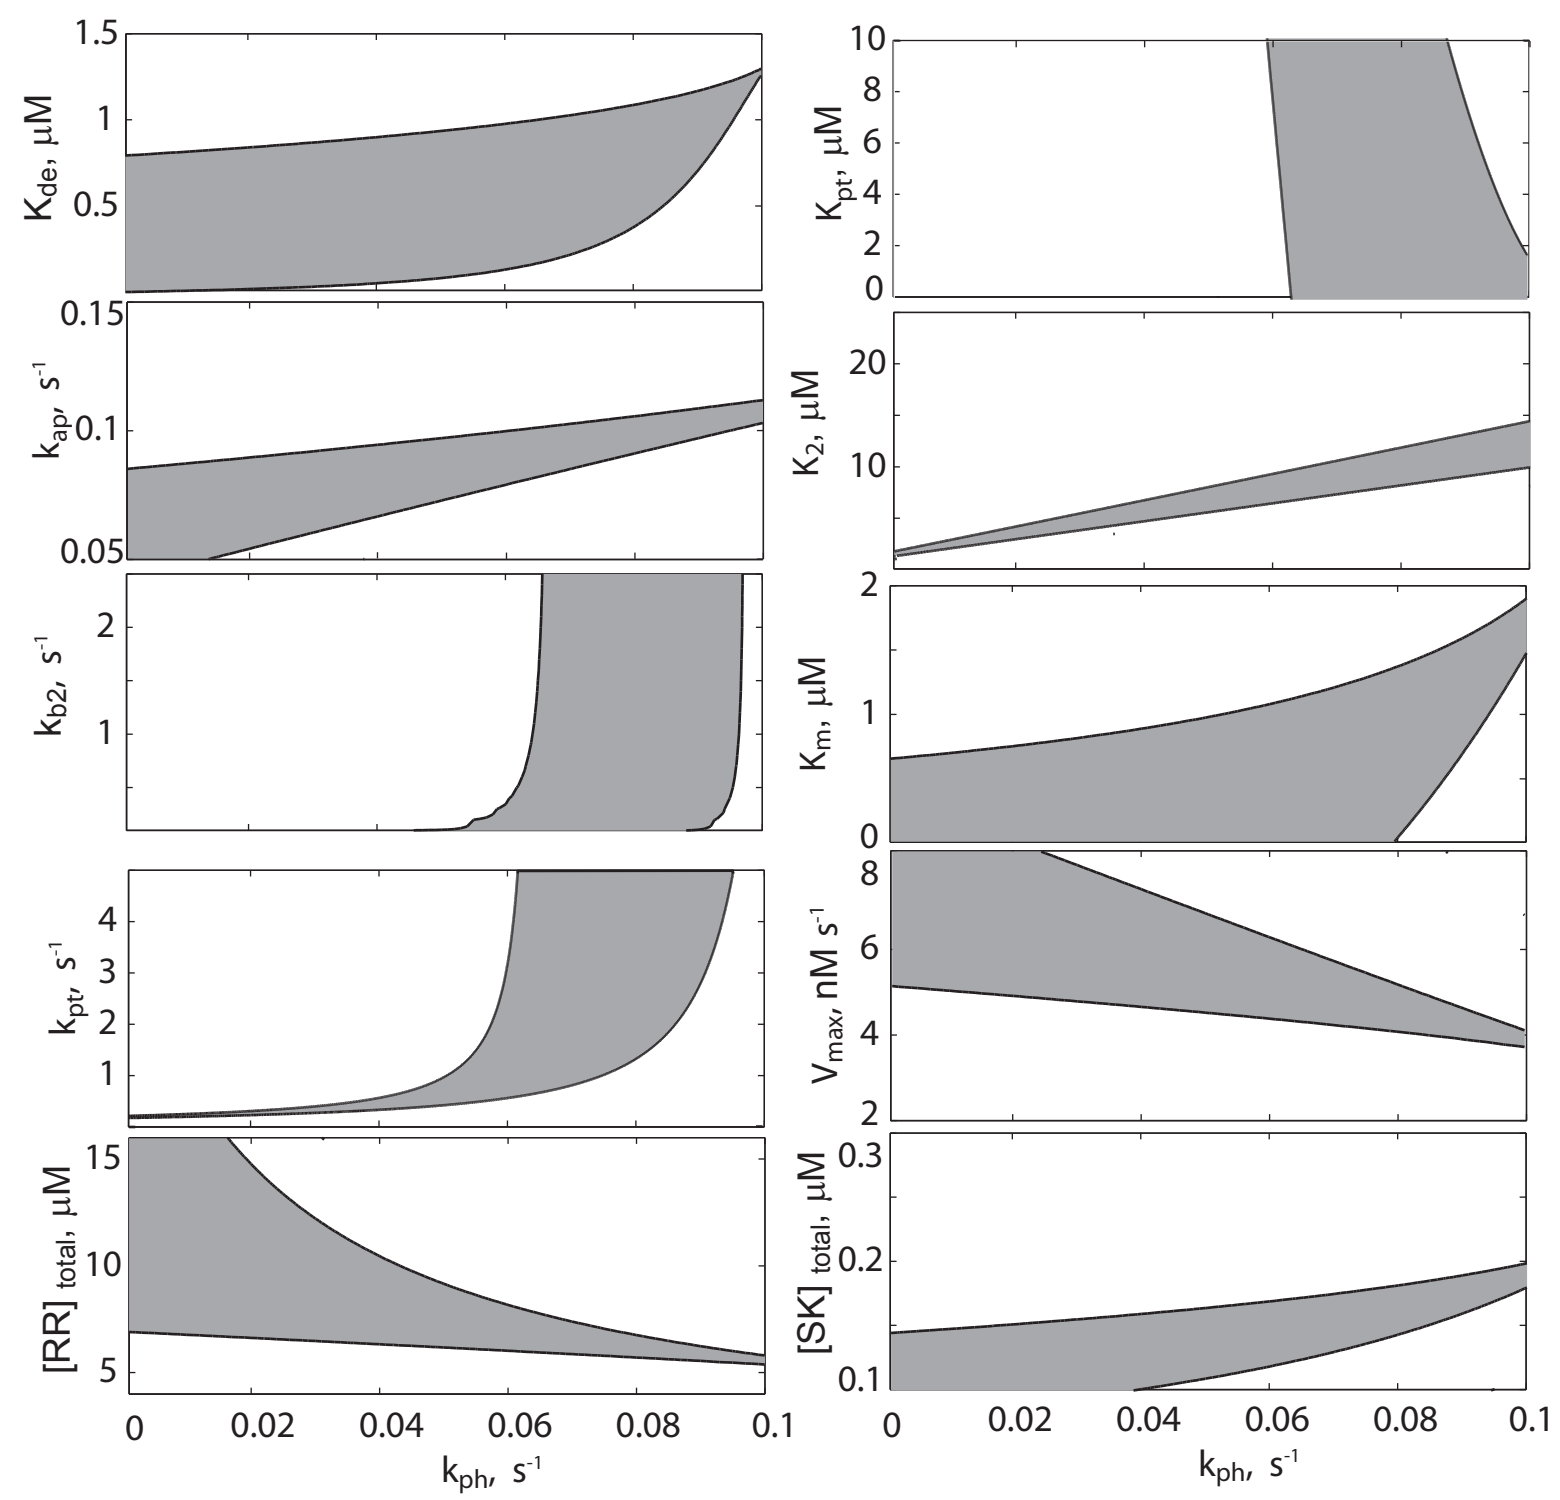

Figure S2

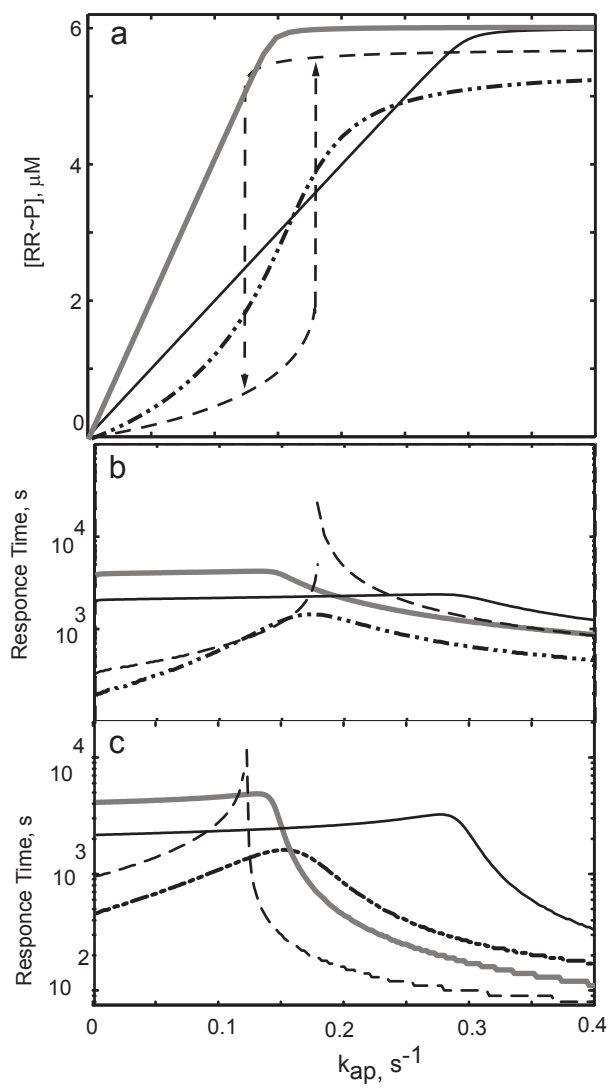

Figure S3

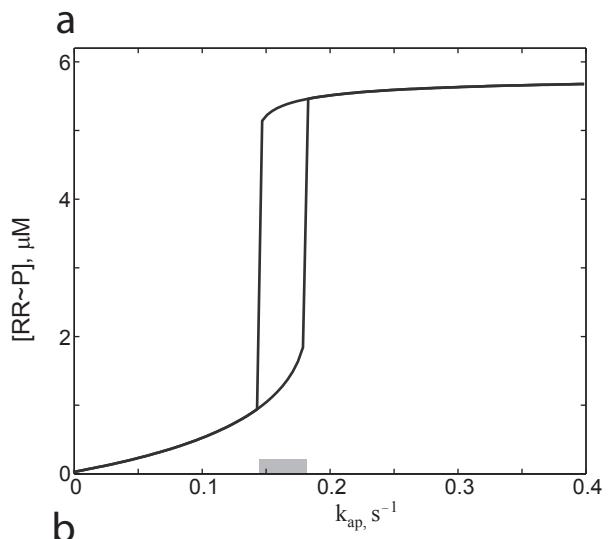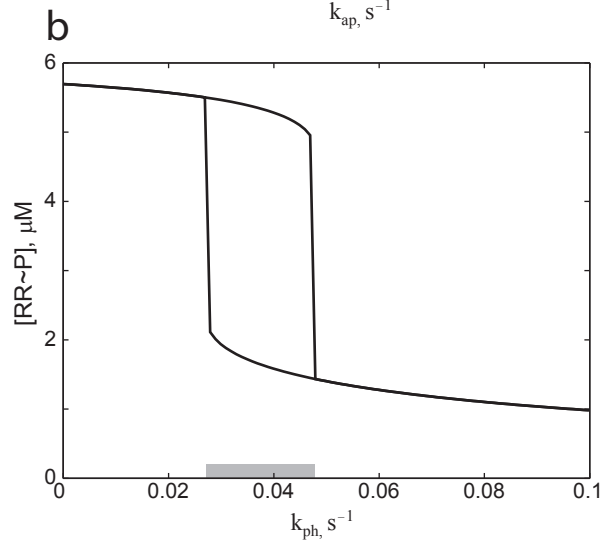

Figure S4

Supplement: NIHMS668022-supplement-Figures.pdf [file NIHMS668022-supplement-Figures.pdf]
